# Supplementary material for: Reconfigurable liquid-core/liquid-cladding optical waveguides with dielectrophoresis-driven virtual microchannels on an electromicrofluidic platform
Source: Royal Society of Chemistry journal article supplement (doi:10.1039/c5lc01233c), 2016-01-01
Supplement: c5lc01233c1.pdf [file c5lc01233c1.pdf]

## Electronic Supplementary Information

### Video 1

The video of light switching accomplished by the moving  $L^2$  optical waveguides of core liquid GBL shifted by DEP in cladding liquid silicone oil among three L-shaped driving electrodes.

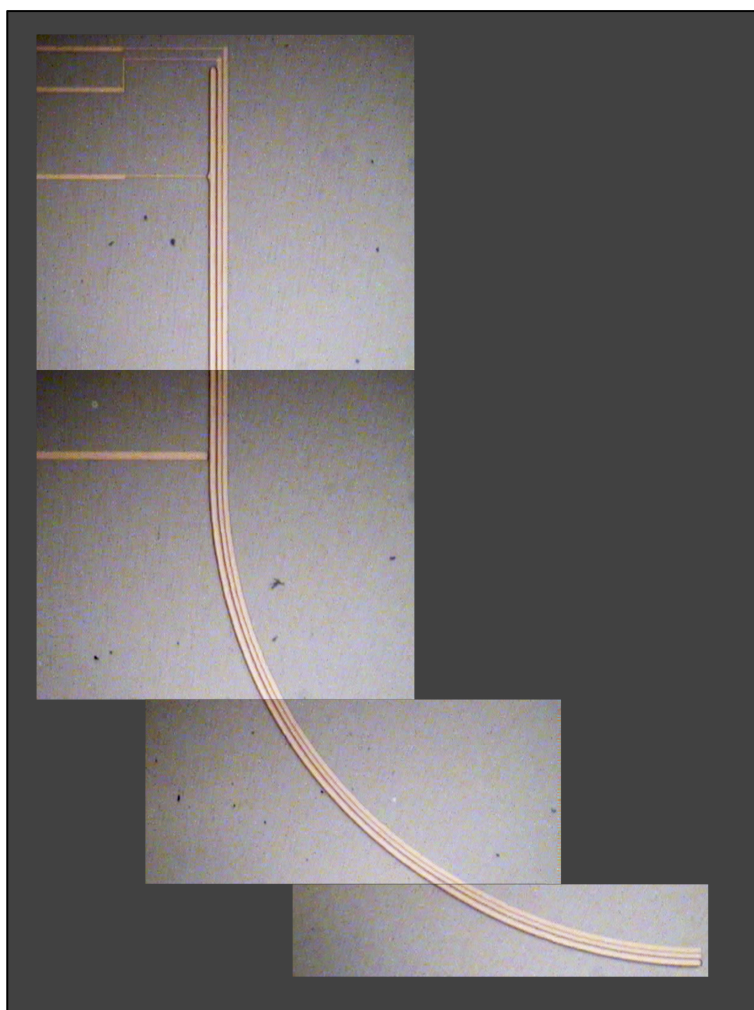

**Fig. S1** Panorama of the entire moving  $L^2$  optical waveguide (length 12.85 mm, width 50  $\mu\text{m}$ , height 50  $\mu\text{m}$ ) constructed by DEP using an L-shaped electrode.
